# Supplementary material
Source: publisher figshare collection journal article supplement (https://acs.figshare.com/ndownloader/files/10813241)
Supplement: Supplementary file 1 [file 10813241]

data_160111_xdy_mpmf
_audit_creation_date              2016-01-12
_audit_creation_method
;
Olex2 1.2
(compiled 2014.03.20 svn.r2914 for OlexSys, GUI svn.r4816)
;
_publ_contact_author_address      ?
_publ_contact_author_email        ?
_publ_contact_author_name         ''
_publ_contact_author_phone        ?
_publ_section_references
;
Dolomanov, O.V., Bourhis, L.J., Gildea, R.J, Howard, J.A.K. & Puschmann, H.
 (2009), J. Appl. Cryst. 42, 339-341.

Sheldrick, G.M. (2008). Acta Cryst. A64, 112-122.
;
_chemical_name_common             ?
_chemical_name_systematic
;
 ? 
;
_chemical_formula_moiety          'C20 H24 Cu2 N20 O2, 2(F6 Si)'
_chemical_formula_sum             'C20 H24 Cu2 F12 N20 O2 Si2'
_chemical_formula_weight          987.85
_chemical_melting_point           ?
_chemical_oxdiff_formula          'C10 H10 N2 O8 F1 Cu1'
loop_
  _atom_type_symbol
  _atom_type_description
  _atom_type_scat_dispersion_real
  _atom_type_scat_dispersion_imag
  _atom_type_scat_source
 'C' 'C' 0.0033 0.0016 'International Tables Vol C Tables 4.2.6.8 and 6.1.1.4'
 'H' 'H' 0.0000 0.0000 'International Tables Vol C Tables 4.2.6.8 and 6.1.1.4'
 'Cu' 'Cu' 0.3201 1.2651 'International Tables Vol C Tables 4.2.6.8 and 6.1.1.4'
 'F' 'F' 0.0171 0.0103 'International Tables Vol C Tables 4.2.6.8 and 6.1.1.4'
 'N' 'N' 0.0061 0.0033 'International Tables Vol C Tables 4.2.6.8 and 6.1.1.4'
 'O' 'O' 0.0106 0.0060 'International Tables Vol C Tables 4.2.6.8 and 6.1.1.4'
 'Si' 'Si' 0.0817 0.0704 'International Tables Vol C Tables 4.2.6.8 and 6.1.1.4'

_space_group_crystal_system       'orthorhombic'
_space_group_IT_number            63
_space_group_name_H-M_alt         'C m c m'
_space_group_name_Hall            '-C 2c 2'
loop_
  _space_group_symop_id
  _space_group_symop_operation_xyz
 1 'x, y, z'
 2 '-x, -y, z+1/2'
 3 'x, -y, -z'
 4 '-x, y, -z+1/2'
 5 'x+1/2, y+1/2, z'
 6 '-x+1/2, -y+1/2, z+1/2'
 7 'x+1/2, -y+1/2, -z'
 8 '-x+1/2, y+1/2, -z+1/2'
 9 '-x, -y, -z'
 10 'x, y, -z-1/2'
 11 '-x, y, z'
 12 'x, -y, z-1/2'
 13 '-x+1/2, -y+1/2, -z'
 14 'x+1/2, y+1/2, -z-1/2'
 15 '-x+1/2, y+1/2, z'
 16 'x+1/2, -y+1/2, z-1/2'

_cell_length_a                    16.9982(8)
_cell_length_b                    11.0287(5)
_cell_length_c                    21.3180(11)
_cell_angle_alpha                 90.00
_cell_angle_beta                  90.00
_cell_angle_gamma                 90.00
_cell_volume                      3996.4(3)
_cell_formula_units_Z             4
_cell_measurement_reflns_used     3475
_cell_measurement_temperature     293(2)
_cell_measurement_theta_max       29.1059
_cell_measurement_theta_min       2.9095
_exptl_absorpt_coefficient_mu     1.231
_exptl_absorpt_correction_T_max   1.00000
_exptl_absorpt_correction_T_min   0.73150
_exptl_absorpt_correction_type    multi-scan
_exptl_absorpt_process_details
;
CrysAlisPro, Agilent Technologies,
Version 1.171.35.11 (release 16-05-2011 CrysAlis171 .NET)
(compiled May 16 2011,17:55:39)
Empirical absorption correction using spherical harmonics,
 implemented in SCALE3 ABSPACK scaling algorithm.
;
_exptl_crystal_colour             'dark violet'
_exptl_crystal_colour_modifier    dark
_exptl_crystal_colour_primary     violet
_exptl_crystal_density_diffrn     1.642
_exptl_crystal_density_meas       ?
_exptl_crystal_density_method     'not measured'
_exptl_crystal_description        block
_exptl_crystal_F_000              1976
_exptl_crystal_preparation        ?
_exptl_crystal_size_max           0.38
_exptl_crystal_size_mid           0.32
_exptl_crystal_size_min           0.23
_exptl_special_details
;
 ? 
;
_diffrn_reflns_av_R_equivalents   0.0635
_diffrn_reflns_av_unetI/netI      0.0400
_diffrn_reflns_limit_h_max        20
_diffrn_reflns_limit_h_min        -16
_diffrn_reflns_limit_k_max        13
_diffrn_reflns_limit_k_min        -13
_diffrn_reflns_limit_l_max        25
_diffrn_reflns_limit_l_min        -21
_diffrn_reflns_number             12448
_diffrn_reflns_theta_full         25.34
_diffrn_reflns_theta_max          25.34
_diffrn_reflns_theta_min          2.92
_diffrn_ambient_temperature       293.15
_diffrn_detector_area_resol_mean  10.3592
_diffrn_measured_fraction_theta_full 0.994
_diffrn_measured_fraction_theta_max 0.994
_diffrn_measurement_device_type   'Xcalibur, Atlas, Gemini ultra'
_diffrn_measurement_method        '\w scans'
_diffrn_orient_matrix_UB_11       -0.0187031000
_diffrn_orient_matrix_UB_12       -0.0267706000
_diffrn_orient_matrix_UB_13       -0.0263155000
_diffrn_orient_matrix_UB_21       -0.0124493000
_diffrn_orient_matrix_UB_22       -0.0491517000
_diffrn_orient_matrix_UB_23       0.0190265000
_diffrn_orient_matrix_UB_31       -0.0351489000
_diffrn_orient_matrix_UB_32       0.0317051000
_diffrn_orient_matrix_UB_33       0.0072654000
_diffrn_radiation_monochromator   graphite
_diffrn_radiation_type            MoK\a
_diffrn_radiation_wavelength      0.71073
_diffrn_source                    'Enhance (Mo) X-ray Source'
_diffrn_standards_decay_%         ?
_diffrn_standards_interval_count  ?
_diffrn_standards_interval_time   ?
_diffrn_standards_number          ?
_reflns_number_gt                 1581
_reflns_number_total              1941
_reflns_odcompleteness_completeness 99.65
_reflns_odcompleteness_iscentric  1
_reflns_odcompleteness_theta      26.32
_reflns_threshold_expression      >2sigma(I)
_computing_cell_refinement
;
CrysAlisPro, Agilent Technologies,
Version 1.171.35.11 (release 16-05-2011 CrysAlis171 .NET)
(compiled May 16 2011,17:55:39)
;
_computing_data_collection
;
CrysAlisPro, Agilent Technologies,
Version 1.171.35.11 (release 16-05-2011 CrysAlis171 .NET)
(compiled May 16 2011,17:55:39)
;
_computing_data_reduction
;
CrysAlisPro, Agilent Technologies,
Version 1.171.35.11 (release 16-05-2011 CrysAlis171 .NET)
(compiled May 16 2011,17:55:39)
;
_computing_molecular_graphics     'Olex2 (Dolomanov et al., 2009)'
_computing_publication_material   'Olex2 (Dolomanov et al., 2009)'
_computing_structure_refinement   'ShelXL (Sheldrick, 2008)'
_computing_structure_solution     'ShelXS (Sheldrick, 2008)'
_refine_diff_density_max          0.472
_refine_diff_density_min          -0.419
_refine_diff_density_rms          0.087
_refine_ls_extinction_coef        ?
_refine_ls_extinction_method      none
_refine_ls_goodness_of_fit_ref    1.054
_refine_ls_hydrogen_treatment     constr
_refine_ls_matrix_type            full
_refine_ls_number_parameters      140
_refine_ls_number_reflns          1941
_refine_ls_number_restraints      0
_refine_ls_R_factor_all           0.0631
_refine_ls_R_factor_gt            0.0496
_refine_ls_restrained_S_all       1.054
_refine_ls_shift/su_max           0.000
_refine_ls_shift/su_mean          0.000
_refine_ls_structure_factor_coef  Fsqd
_refine_ls_weighting_details
'calc w=1/[\s^2^(Fo^2^)+(0.0774P)^2^+8.8562P] where P=(Fo^2^+2Fc^2^)/3'
_refine_ls_weighting_scheme       calc
_refine_ls_wR_factor_gt           0.1324
_refine_ls_wR_factor_ref          0.1400
_refine_special_details
;
 Refinement of F^2^ against ALL reflections.  The weighted R-factor wR and 
 goodness of fit S are based on F^2^, conventional R-factors R are based 
 on F, with F set to zero for negative F^2^. The threshold expression of 
 F^2^ > 2sigma(F^2^) is used only for calculating R-factors(gt) etc. and is 
 not relevant to the choice of reflections for refinement.  R-factors based 
 on F^2^ are statistically about twice as large as those based on F, and R- 
 factors based on ALL data will be even larger. 
;
_olex2_refinement_description
;
1. Fixed Uiso
 At 1.2 times of:
  All C(H) groups, All N(H) groups, All N(H,H) groups
 At 1.5 times of:
  All O(H,H) groups
2. Others
 Fixed Sof: H1A(0.5) H1B(0.5)
3.a Rotating group:
 O1(H1A,H1B)
3.b Aromatic/amide H refined with riding coordinates:
 N2(H2), C1(H1), C4(H4)
3.c X=CH2 refined with riding coordinates:
 N5(H5A,H5B)
;
_atom_sites_solution_hydrogens    geom
_atom_sites_solution_primary      direct
_atom_sites_solution_secondary    difmap
loop_
  _atom_site_label
  _atom_site_type_symbol
  _atom_site_fract_x
  _atom_site_fract_y
  _atom_site_fract_z
  _atom_site_U_iso_or_equiv
  _atom_site_adp_type
  _atom_site_occupancy
  _atom_site_calc_flag
  _atom_site_disorder_assembly
  _atom_site_disorder_group
  _atom_site_site_symmetry_order
  _atom_site_refinement_flags_posn
  _atom_site_refinement_flags_adp
  _atom_site_refinement_flags_occupancy
 Cu1 Cu 0.5000 0.06778(5) 0.44005(3) 0.0270(2) Uani 1 d . . 2 S T P
 O1 O 0.5000 0.1599(4) 0.35002(19) 0.0457(10) Uani 1 d . . 2 S T P
 H1A H 0.5203 0.2323 0.3533 0.069 Uiso 0.50 d . . 1 GR . .
 H1B H 0.4522 0.1673 0.3356 0.069 Uiso 0.50 d . . 1 GR . .
 N1 N 0.58268(18) -0.0574(3) 0.41995(16) 0.0308(7) Uani 1 d . . 1 . . .
 N2 N 0.6647(2) -0.1735(3) 0.36619(17) 0.0421(9) Uani 1 d . . 1 . . .
 H2 H 0.6933 -0.2002 0.3359 0.050 Uiso 1 calc . . 1 R . .
 N3 N 0.58236(17) -0.1714(3) 0.51767(15) 0.0304(7) Uani 1 d . . 1 . . .
 N4 N 0.6606(2) -0.3493(3) 0.51373(18) 0.0434(9) Uani 1 d . . 1 . . .
 N5 N 0.7226(3) -0.4192(3) 0.4237(2) 0.0622(12) Uani 1 d . . 1 . . .
 H5A H 0.7355 -0.4845 0.4432 0.075 Uiso 1 calc . . 1 R . .
 H5B H 0.7362 -0.4092 0.3852 0.075 Uiso 1 calc . . 1 R . .
 C1 C 0.6196(2) -0.0757(4) 0.3658(2) 0.0378(9) Uani 1 d . . 1 . . .
 H1 H 0.6144 -0.0249 0.3313 0.045 Uiso 1 calc . . 1 R . .
 C2 C 0.6565(2) -0.2242(4) 0.4256(2) 0.0399(10) Uani 1 d . . 1 . . .
 C3 C 0.6063(2) -0.1514(3) 0.45844(19) 0.0310(8) Uani 1 d . . 1 . . .
 C4 C 0.6139(3) -0.2716(4) 0.5425(2) 0.0397(10) Uani 1 d . . 1 . . .
 H4 H 0.6017 -0.2881 0.5842 0.048 Uiso 1 calc . . 1 R . .
 C5 C 0.6813(2) -0.3325(4) 0.4536(2) 0.0460(11) Uani 1 d . . 1 . . .
 Si1 Si 0.81741(11) -0.28511(19) 0.2500 0.0496(5) Uani 1 d . . 2 S T P
 F1 F 0.7436(3) -0.1850(4) 0.2500 0.0795(14) Uani 1 d . . 2 S T P
 F2 F 0.8620(4) -0.2112(5) 0.3042(3) 0.171(3) Uani 1 d . . 1 . . .
 F3 F 0.7711(3) -0.3598(5) 0.3047(3) 0.173(3) Uani 1 d . . 1 . . .
 F4 F 0.8898(3) -0.3894(5) 0.2500 0.0811(14) Uani 1 d . . 2 S T P

loop_
  _atom_site_aniso_label
  _atom_site_aniso_U_11
  _atom_site_aniso_U_22
  _atom_site_aniso_U_33
  _atom_site_aniso_U_23
  _atom_site_aniso_U_13
  _atom_site_aniso_U_12
 Cu1 0.0290(4) 0.0285(4) 0.0234(4) -0.0033(3) 0.000 0.000
 O1 0.046(2) 0.058(3) 0.033(2) 0.015(2) 0.000 0.000
 N1 0.0296(16) 0.0325(16) 0.0302(17) -0.0041(14) 0.0042(13) 0.0023(13)
 N2 0.0442(19) 0.046(2) 0.036(2) -0.0039(16) 0.0136(16) 0.0032(16)
 N3 0.0326(16) 0.0268(15) 0.0320(19) -0.0050(14) 0.0009(13) 0.0052(13)
 N4 0.050(2) 0.0376(19) 0.042(2) -0.0002(16) 0.0016(17) 0.0096(16)
 N5 0.072(3) 0.046(2) 0.069(3) -0.005(2) 0.018(2) 0.023(2)
 C1 0.041(2) 0.040(2) 0.032(2) -0.0024(18) 0.0048(18) 0.0004(18)
 C2 0.034(2) 0.040(2) 0.046(3) -0.0071(19) 0.0029(18) 0.0010(17)
 C3 0.0260(18) 0.0320(19) 0.035(2) -0.0073(17) 0.0004(16) 0.0006(15)
 C4 0.047(2) 0.037(2) 0.035(2) -0.0007(19) -0.0010(19) 0.0025(19)
 C5 0.039(2) 0.042(2) 0.056(3) -0.004(2) 0.002(2) 0.0049(19)
 Si1 0.0486(10) 0.0726(12) 0.0276(9) 0.000 0.000 0.0170(9)
 F1 0.081(3) 0.105(4) 0.053(3) 0.000 0.000 0.045(3)
 F2 0.178(5) 0.165(5) 0.172(5) -0.096(4) -0.112(4) 0.071(4)
 F3 0.185(5) 0.160(4) 0.172(5) 0.103(4) 0.119(4) 0.085(4)
 F4 0.079(3) 0.105(3) 0.060(3) 0.000 0.000 0.045(3)

_geom_special_details
;
 All esds (except the esd in the dihedral angle between two l.s. planes) 
 are estimated using the full covariance matrix.  The cell esds are taken 
 into account individually in the estimation of esds in distances, angles 
 and torsion angles; correlations between esds in cell parameters are only 
 used when they are defined by crystal symmetry.  An approximate (isotropic) 
 treatment of cell esds is used for estimating esds involving l.s. planes. 
;
loop_
  _geom_bond_atom_site_label_1
  _geom_bond_atom_site_label_2
  _geom_bond_distance
  _geom_bond_site_symmetry_2
  _geom_bond_publ_flag
 Cu1 Cu1 2.9612(12) 9_656 ?
 Cu1 O1 2.172(4) . ?
 Cu1 N1 2.016(3) . ?
 Cu1 N1 2.016(3) 11_655 ?
 Cu1 N3 2.019(3) 9_656 ?
 Cu1 N3 2.019(3) 3_556 ?
 O1 H1A 0.8721 . ?
 O1 H1B 0.8723 . ?
 N1 C1 1.329(5) . ?
 N1 C3 1.381(5) . ?
 N2 H2 0.8600 . ?
 N2 C1 1.323(5) . ?
 N2 C2 1.391(6) . ?
 N3 Cu1 2.019(3) 9_656 ?
 N3 C3 1.345(5) . ?
 N3 C4 1.338(5) . ?
 N4 C4 1.320(5) . ?
 N4 C5 1.343(6) . ?
 N5 H5A 0.8600 . ?
 N5 H5B 0.8600 . ?
 N5 C5 1.346(6) . ?
 C1 H1 0.9300 . ?
 C2 C3 1.365(6) . ?
 C2 C5 1.401(6) . ?
 C4 H4 0.9300 . ?
 Si1 F1 1.671(4) . ?
 Si1 F2 1.604(5) . ?
 Si1 F2 1.604(5) 10_556 ?
 Si1 F3 1.630(4) . ?
 Si1 F3 1.630(4) 10_556 ?
 Si1 F4 1.684(4) . ?

loop_
  _geom_angle_atom_site_label_1
  _geom_angle_atom_site_label_2
  _geom_angle_atom_site_label_3
  _geom_angle
  _geom_angle_site_symmetry_1
  _geom_angle_site_symmetry_3
  _geom_angle_publ_flag
 O1 Cu1 Cu1 177.58(13) . 9_656 ?
 N1 Cu1 Cu1 80.66(10) 11_655 9_656 ?
 N1 Cu1 Cu1 80.66(10) . 9_656 ?
 N1 Cu1 O1 97.62(13) 11_655 . ?
 N1 Cu1 O1 97.62(13) . . ?
 N1 Cu1 N1 88.39(17) . 11_655 ?
 N1 Cu1 N3 89.94(12) . 3_556 ?
 N1 Cu1 N3 164.92(13) 11_655 3_556 ?
 N1 Cu1 N3 164.92(13) . 9_656 ?
 N1 Cu1 N3 89.94(12) 11_655 9_656 ?
 N3 Cu1 Cu1 84.28(9) 3_556 9_656 ?
 N3 Cu1 Cu1 84.28(9) 9_656 9_656 ?
 N3 Cu1 O1 97.45(12) 9_656 . ?
 N3 Cu1 O1 97.45(12) 3_556 . ?
 N3 Cu1 N3 87.79(17) 3_556 9_656 ?
 Cu1 O1 H1A 111.0 . . ?
 Cu1 O1 H1B 110.7 . . ?
 H1A O1 H1B 108.1 . . ?
 C1 N1 Cu1 128.2(3) . . ?
 C1 N1 C3 105.3(3) . . ?
 C3 N1 Cu1 126.1(3) . . ?
 C1 N2 H2 127.0 . . ?
 C1 N2 C2 105.9(3) . . ?
 C2 N2 H2 127.0 . . ?
 C3 N3 Cu1 122.4(2) . 9_656 ?
 C4 N3 Cu1 124.6(3) . 9_656 ?
 C4 N3 C3 112.7(3) . . ?
 C4 N4 C5 120.8(4) . . ?
 H5A N5 H5B 120.0 . . ?
 C5 N5 H5A 120.0 . . ?
 C5 N5 H5B 120.0 . . ?
 N1 C1 H1 123.4 . . ?
 N2 C1 N1 113.1(4) . . ?
 N2 C1 H1 123.4 . . ?
 N2 C2 C5 134.5(4) . . ?
 C3 C2 N2 107.1(4) . . ?
 C3 C2 C5 118.1(4) . . ?
 N3 C3 N1 126.4(3) . . ?
 N3 C3 C2 125.1(4) . . ?
 C2 C3 N1 108.5(4) . . ?
 N3 C4 H4 116.8 . . ?
 N4 C4 N3 126.4(4) . . ?
 N4 C4 H4 116.8 . . ?
 N4 C5 N5 119.4(4) . . ?
 N4 C5 C2 116.5(4) . . ?
 N5 C5 C2 124.2(5) . . ?
 F1 Si1 F4 178.3(3) . . ?
 F2 Si1 F1 91.1(2) . . ?
 F2 Si1 F1 91.1(2) 10_556 . ?
 F2 Si1 F2 92.1(6) . 10_556 ?
 F2 Si1 F3 88.3(4) . . ?
 F2 Si1 F3 179.3(3) 10_556 . ?
 F2 Si1 F3 88.3(4) 10_556 10_556 ?
 F2 Si1 F3 179.3(3) . 10_556 ?
 F2 Si1 F4 90.1(2) 10_556 . ?
 F2 Si1 F4 90.1(2) . . ?
 F3 Si1 F1 88.3(2) . . ?
 F3 Si1 F1 88.3(2) 10_556 . ?
 F3 Si1 F3 91.3(5) 10_556 . ?
 F3 Si1 F4 90.5(2) . . ?
 F3 Si1 F4 90.5(2) 10_556 . ?

loop_
  _geom_torsion_atom_site_label_1
  _geom_torsion_atom_site_label_2
  _geom_torsion_atom_site_label_3
  _geom_torsion_atom_site_label_4
  _geom_torsion
  _geom_torsion_site_symmetry_1
  _geom_torsion_site_symmetry_2
  _geom_torsion_site_symmetry_3
  _geom_torsion_site_symmetry_4
  _geom_torsion_publ_flag
 Cu1 Cu1 N1 C1 175.1(3) 9_656 . . . ?
 Cu1 Cu1 N1 C3 2.9(3) 9_656 . . . ?
 Cu1 N1 C1 N2 -173.3(3) . . . . ?
 Cu1 N1 C3 N3 -4.9(5) . . . . ?
 Cu1 N1 C3 C2 173.1(3) . . . . ?
 Cu1 N3 C3 N1 3.6(5) 9_656 . . . ?
 Cu1 N3 C3 C2 -174.0(3) 9_656 . . . ?
 Cu1 N3 C4 N4 171.4(3) 9_656 . . . ?
 O1 Cu1 N1 C1 -3.2(3) . . . . ?
 O1 Cu1 N1 C3 -175.4(3) . . . . ?
 N1 Cu1 N1 C1 94.3(3) 11_655 . . . ?
 N1 Cu1 N1 C3 -77.9(3) 11_655 . . . ?
 N2 C2 C3 N1 0.7(4) . . . . ?
 N2 C2 C3 N3 178.7(3) . . . . ?
 N2 C2 C5 N4 -179.6(4) . . . . ?
 N2 C2 C5 N5 -0.7(8) . . . . ?
 N3 Cu1 N1 C1 -100.7(3) 3_556 . . . ?
 N3 Cu1 N1 C1 178.0(4) 9_656 . . . ?
 N3 Cu1 N1 C3 5.9(6) 9_656 . . . ?
 N3 Cu1 N1 C3 87.1(3) 3_556 . . . ?
 C1 N1 C3 N3 -178.5(4) . . . . ?
 C1 N1 C3 C2 -0.6(4) . . . . ?
 C1 N2 C2 C3 -0.6(4) . . . . ?
 C1 N2 C2 C5 172.2(5) . . . . ?
 C2 N2 C1 N1 0.3(5) . . . . ?
 C3 N1 C1 N2 0.2(5) . . . . ?
 C3 N3 C4 N4 -3.2(6) . . . . ?
 C3 C2 C5 N4 -7.4(6) . . . . ?
 C3 C2 C5 N5 171.5(4) . . . . ?
 C4 N3 C3 N1 178.3(4) . . . . ?
 C4 N3 C3 C2 0.7(5) . . . . ?
 C4 N4 C5 N5 -173.6(4) . . . . ?
 C4 N4 C5 C2 5.3(6) . . . . ?
 C5 N4 C4 N3 0.1(7) . . . . ?
 C5 C2 C3 N1 -173.5(4) . . . . ?
 C5 C2 C3 N3 4.5(6) . . . . ?

_platon_squeeze_details
;
;
loop_
  _platon_squeeze_void_nr
  _platon_squeeze_void_average_x
  _platon_squeeze_void_average_y
  _platon_squeeze_void_average_z
  _platon_squeeze_void_volume
  _platon_squeeze_void_count_electrons
  _platon_squeeze_void_content
 1 0.000 0.000 -0.002 484 66 ' '
 2 0.500 0.500 0.733 484 66 ' '
